# Contents

Human Molecular Genetics

Volume 15 Review Issue 2 15 October 2006

---

## REVIEWS

|                                                                                                                                                   |                                                     |             |
|---------------------------------------------------------------------------------------------------------------------------------------------------|-----------------------------------------------------|-------------|
| <b>New techniques to understand chromosome dosage: mouse models of aneuploidy</b>                                                                 | V.L.J. Tybulewicz and E.M.C. Fisher                 | <b>R103</b> |
| <b>The genetics of mental retardation</b>                                                                                                         | F.L. Raymond and P. Tarpey                          | <b>R110</b> |
| <b>Genetic susceptibility to myocardial infarction and coronary artery disease</b>                                                                | E.J. Topol, J. Smith, E.F. Plow and Q.K. Wang       | <b>R117</b> |
| <b>Genetics of obesity and the prediction of risk for health</b>                                                                                  | A.J. Walley, A.I.F. Blakemore and P. Froguel        | <b>R124</b> |
| <b>How lifetimes shape epigenotype within and across generations</b>                                                                              | N.C. Whitelaw and E. Whitelaw                       | <b>R131</b> |
| <b>Epigenetics of autism spectrum disorders</b>                                                                                                   | N.C. Schanen                                        | <b>R138</b> |
| <b>Molecular bases of progeroid syndromes</b>                                                                                                     | C.L. Navarro, P. Cau and N. Lévy                    | <b>R151</b> |
| <b>RNA-dominant diseases</b>                                                                                                                      | R.J. Osborne and C.A. Thornton                      | <b>R162</b> |
| <b>Signatures of adaptive evolution within human non-coding sequence</b>                                                                          | C.P. Ponting and G. Lunter                          | <b>R170</b> |
| <b>The genetic architecture of normal variation in human pigmentation: an evolutionary perspective and model</b>                                  | B. McEvoy, S. Beleza and M.D. Shriver               | <b>R176</b> |
| <b>Recent advances in the genetics of amyotrophic lateral sclerosis and frontotemporal dementia: common pathways in neurodegenerative disease</b> | K. Talbot and O. Ansorge                            | <b>R182</b> |
| <b>Untangling the tau gene association with neurodegenerative disorders</b>                                                                       | A.M. Pittman, H.-C. Fung and R. de Silva            | <b>R188</b> |
| <b>The many facets of the Wilms' tumour gene, <i>WT1</i></b>                                                                                      | P. Hohenstein and N.D. Hastie                       | <b>R196</b> |
| <b>Type-2 diabetes: a cocktail of genetic discovery</b>                                                                                           | H. Freeman and R.D. Cox                             | <b>R202</b> |
| <b>Signaling pathways in self-renewing hematopoietic and leukemic stem cells: do all stem cells need a niche?</b>                                 | A. Rizo, E. Vellenga, G. de Haan and J.J. Schuringa | <b>R210</b> |
| <b>Noonan syndrome and related disorders: dysregulated RAS-mitogen activated protein kinase signal transduction</b>                               | B.D. Gelb and M. Tartaglia                          | <b>R220</b> |
| <b>Planar cell polarity, ciliogenesis and neural tube defects</b>                                                                                 | J.B. Wallingford                                    | <b>R227</b> |

|                                                                                         |                                                                                                                          |             |
|-----------------------------------------------------------------------------------------|--------------------------------------------------------------------------------------------------------------------------|-------------|
| <b>Towards understanding CRUMBS function in retinal dystrophies</b>                     | M. Richard, R. Roepman, W.M. Aartsen, A.G.S.H. van Rossum, A.I. den Hollander, E. Knust, J. Wijnholds and F.P.M. Cremers | <b>R235</b> |
| <b>Mitochondrial DNA polymerase-<math>\gamma</math> and human disease</b>               | G. Hudson and P.F. Chinnery                                                                                              | <b>R244</b> |
| <b>Challenges and opportunities in dystrophin-deficient cardiomyopathy gene therapy</b> | D. Duan                                                                                                                  | <b>R253</b> |
| <b>Usher syndrome: molecular links of pathogenesis, proteins and pathways</b>           | H. Kremer, E. van Wijk, T. Märker, U. Wolfrum and R. Roepman                                                             | <b>R262</b> |
| <b>Molecular components of the mammalian circadian clock</b>                            | C.H. Ko and J.S. Takahashi                                                                                               | <b>R271</b> |

# Subscriptions

A subscription to *Human Molecular Genetics* comprises 26 issues. All prices include postage, and for subscribers outside the UK delivery is by Standard Air. *Human Molecular Genetics* Advance Access contains papers that have recently been accepted, but have not yet been included within an issue. Advance Access is updated weekly.

## Annual subscription rate (Volume 15, 2006):

### Institutional

Print edition and site-wide online access: £1118/US\$1934

Print edition only: £1062/US\$1837

Site-wide online access only: £1006/US\$1740

### Personal

Print edition and individual online access: £280/US\$476

Please note: £ Sterling rates apply in Europe, US\$ elsewhere

There may be other subscription rates available, for a complete listing please visit [www.hmg.oupjournals.org/subinfo/](http://www.hmg.oupjournals.org/subinfo/).

Full prepayment, in the correct currency, is required for all orders. Orders are regarded as firm and payments are not refundable. Subscriptions are accepted and entered on a complete volume basis. Claims cannot be considered more than FOUR months after publication or date of order, whichever is later. All subscriptions in Canada are subject to GST. Subscriptions in the EU may be subject to European VAT. If registered, please supply details to avoid unnecessary charges. For subscriptions that include online versions, a proportion of the subscription price may be subject to UK VAT. Personal rate subscriptions are only available if payment is made by personal cheque or credit card and delivery is to a private address.

The current year and two previous years' issues are available from Oxford University Press. Previous volumes can be obtained from the Periodicals Service Company, 11 Main Street, Germantown, NY 12526, USA. Email: [psc@periodicals.com](mailto:psc@periodicals.com). Tel: +1 (518) 537 4700. Fax: +1 (518) 537 5899.

**For further information, please contact:** Journals Customer Service Department, Oxford University Press, Great Clarendon Street, Oxford OX2 6DP, UK. Email: [jnls.cust.serv@oupjournals.org](mailto:jnls.cust.serv@oupjournals.org). Tel (and answerphone outside normal working hours): +44 (0)1865 353907. Fax: +44 (0)1865 353485. In the US, please contact: Journals Customer Service Department, Oxford University Press, 2001 Evans Road, Cary, NC 27513, USA. Email: [jnlorders@oupjournals.org](mailto:jnlorders@oupjournals.org). Tel (and answerphone outside normal working hours): 800 852 7323 (toll-free in USA/Canada). Fax: 919 677 1714. **In Japan, please contact:** Journals Customer Services, Oxford University Press, 1-1-17-5F, Mukogaoka, Bunkyo-ku, Tokyo, 113-0023, Japan. Email: [okudaoup@po.ijinet.or.jp](mailto:okudaoup@po.ijinet.or.jp). Tel: (03) 3813 1461. Fax: (03) 3818 1522.

**Methods of payment.** (i) Cheque (payable to Oxford University Press, to Oxford University Press, Cashiers Office, Great Clarendon Street, Oxford OX2 6DP, UK) in GB£ Sterling (drawn on a UK bank), US\$ Dollars (drawn on a US bank), or EU€ Euros. (ii) Bank transfer to Barclays Bank Plc, Oxford Group Office, Oxford (bank sort code 20-65-18) (UK), overseas only Swift code BARC GB 22 (GB£ Sterling to account no. 70299332, IBAN GB89BARC20651870299332; US\$ Dollars to account no. 66014600, IBAN GB27BARC20651866014600; EU€ Euros to account no. 78923655, IBAN GB16BARC20651878923655). (iii) Credit card (Mastercard, Visa, Switch or American Express).

*Human Molecular Genetics* is published every two weeks plus two extra issues (in April and October) by Oxford University Press, Oxford, UK. Annual subscription price is £1118/US\$1934. *Human Molecular Genetics* is distributed by Mercury International, 365 Blair Road, Avenel, NJ 07001, USA. Periodicals postage paid at Rahway, NJ and at additional entry points.

US Postmaster: send address changes to *Human Molecular Genetics* (ISSN 0964 6906), c/o Mercury International, 365 Blair Road, Avenel, NJ 07001, USA.

## Permissions

For information on how to request permissions to reproduce articles/information from this journal, please visit [www.oupjournals.org/permissions](http://www.oupjournals.org/permissions).

## Advertising

Inquiries about advertising should be sent to Peter Carpenter, PRC Associates. Email: [mail@prcassoc.co.uk](mailto:mail@prcassoc.co.uk). Fax: +44 (0)20 8786 7262.

© Oxford University Press 2006

All rights reserved; no part of this publication may be reproduced, stored in a retrieval system, or transmitted in any form or by any means, electronic, mechanical, photocopying, recording, or otherwise without prior written permission of the Publishers, or a licence permitting restricted copying issued in the UK by the Copyright Licensing Agency Ltd, 90 Tottenham Court Road, London W1P 9HE, or in the USA by the Copyright Clearance Center, 222 Rosewood Drive, Danvers, MA 01923.

Typeset by Techset Composition Ltd, Salisbury, UK.

Printed by Bell & Bain, Glasgow, UK, on acid-free paper.
